# Supplementary material for: Hydrothermal synthesis, structure and magnetic properties of a three-dimensional cobalt(ii) – aminophenyltetrazolate coordination polymer
Source: Royal Society of Chemistry journal article supplement (doi:10.1039/c4dt00456f), 2014-01-01
Supplement: c4dt00456f1.pdf [file c4dt00456f1.pdf]

## Supplementary Materials

Hydrothermal Synthesis, Structure and Magnetic Properties of a Three-Dimensional Cobalt(II) –  
Aminophenyltetrazolate Coordination Polymer.

Tiffany M. Smith, Michael Tichenor, Yuanzhu Zhang, Kim R. Dunbar and Jon Zubieta

**Figures S1.** ORTEP view of the building unit of  $[\text{Co}_3(\text{H}_2\text{O})_2(\text{OH})_2(\text{C}_7\text{N}_5\text{H}_6)_4]$ , showing the partial atom-labeling schemes and 50% thermal ellipsoids.

**Figures S2.** Infrared spectra of  $[\text{Co}_3(\text{H}_2\text{O})_2(\text{OH})_2(\text{C}_7\text{N}_5\text{H}_6)_4]$ .

**Figures S3.** TGA plot for  $[\text{Co}_3(\text{H}_2\text{O})_2(\text{OH})_2(\text{C}_7\text{N}_5\text{H}_6)_4]$ .

**Figure S4.** The field-dependent magnetization for  $[\text{Co}_3(\text{H}_2\text{O})_2(\text{OH})_2(\text{C}_7\text{N}_5\text{H}_6)_4]$  at 300 K.

**Figure S5.** The temperature dependence of the inverse susceptibility for  $[\text{Co}_3(\text{H}_2\text{O})_2(\text{OH})_2(\text{C}_7\text{N}_5\text{H}_6)_4]$ . The red line through the data points is the fit to the Curie-Weiss law above 50 K.

**Tables S1-S9.** Tables of crystal data, atomic positional parameters and isotropic temperature factors, bond lengths and angles, anisotropic temperature factors, hydrogen atom positions, and hydrogen bond distances for  $[\text{Co}_3(\text{H}_2\text{O})_2(\text{OH})_2(\text{C}_7\text{N}_5\text{H}_6)_4]$ .

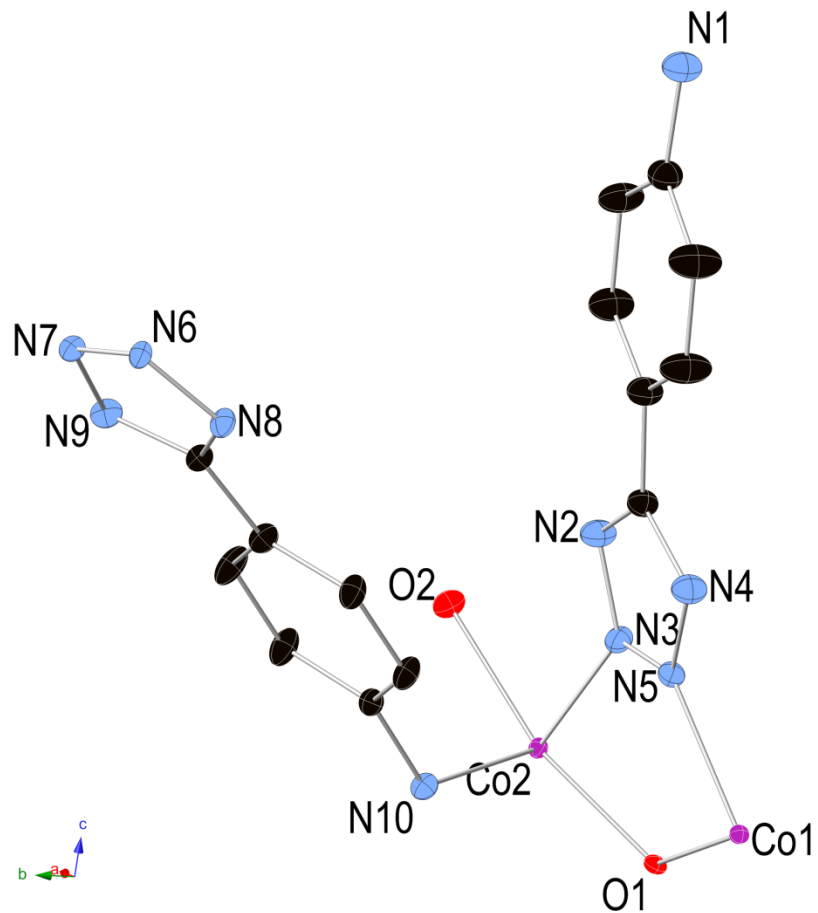

**Figure S1.** ORTEP view of compound  $[\text{Co}_3(\text{H}_2\text{O})_2(\text{OH})_2(\text{C}_7\text{N}_5\text{H}_6)_4]$ , showing the atom-labeling scheme and 50% thermal ellipsoids.

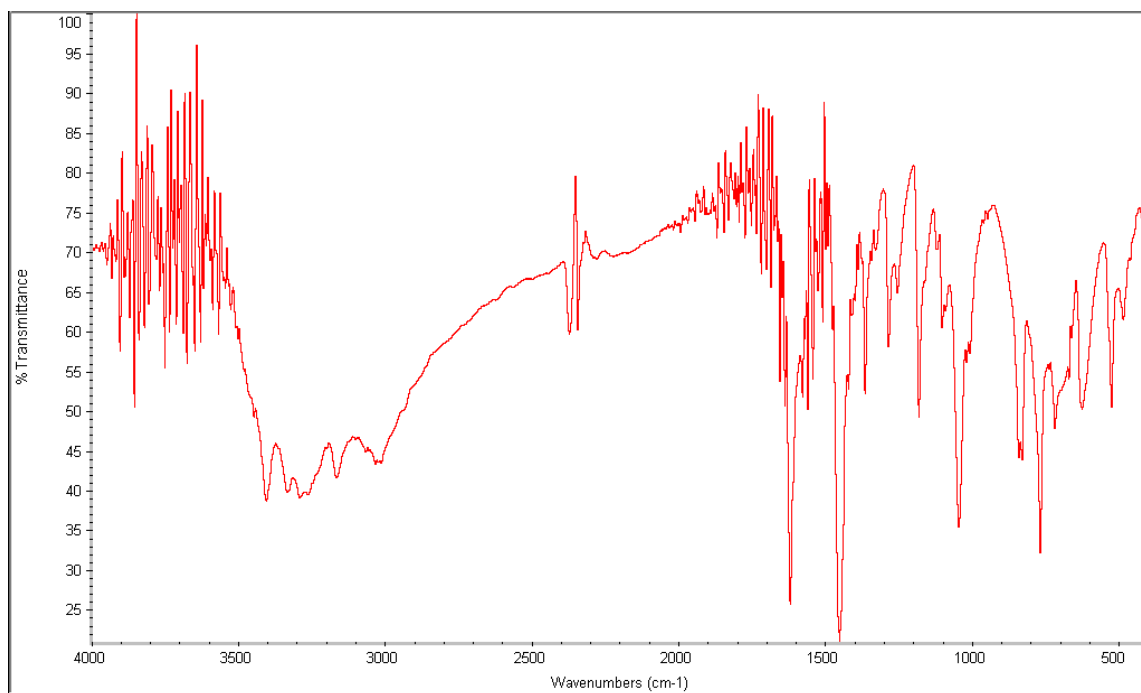

**Figure S2.** Infrared spectra of  $[\text{Co}_3(\text{H}_2\text{O})_2(\text{OH})_2(\text{C}_7\text{N}_5\text{H}_6)_4]$ .

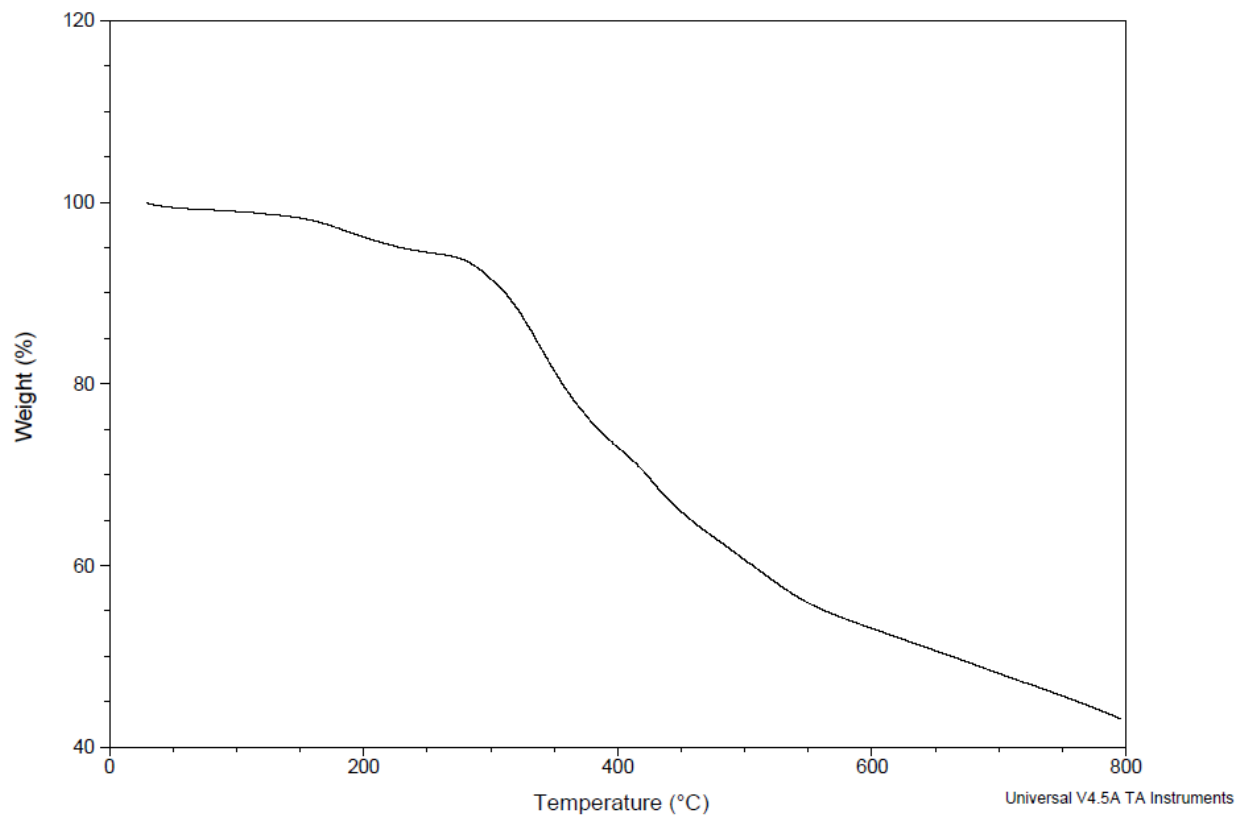

**Figure S3.** Thermogravimetric analysis profile for  $[\text{Co}_3(\text{H}_2\text{O})_2(\text{OH})_2(\text{C}_7\text{N}_5\text{H}_6)_4]$  in the 25-800°C range.

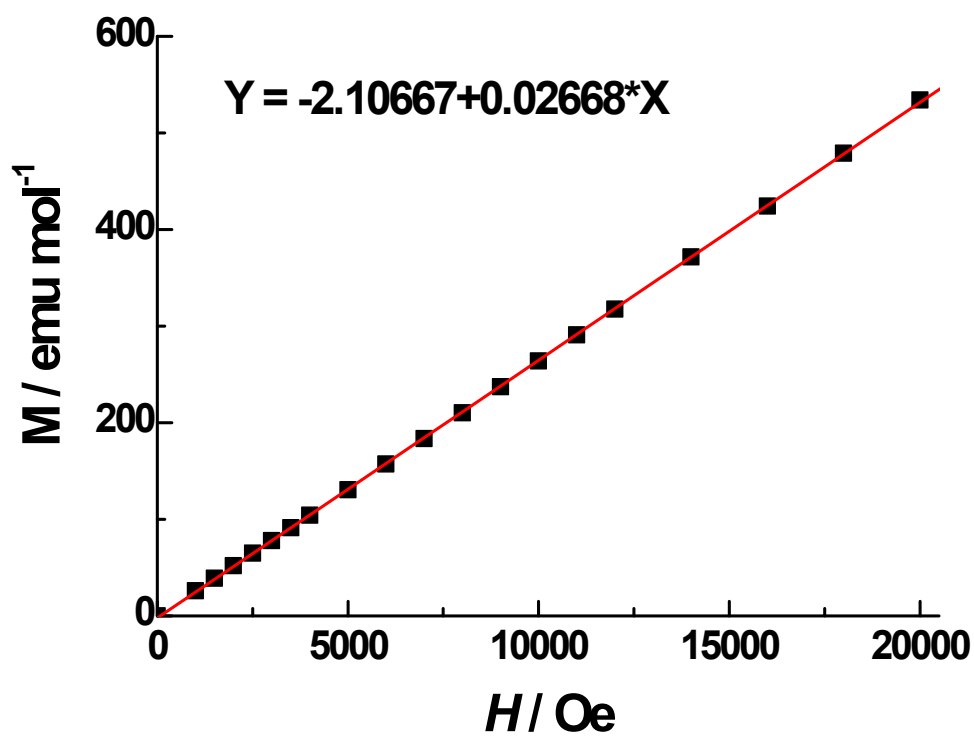

Figure S4. The field-dependent magnetization for  $[\text{Co}_3(\text{H}_2\text{O})_2(\text{OH})_2(\text{C}_7\text{N}_5\text{H}_6)_4]$  at 300 K.

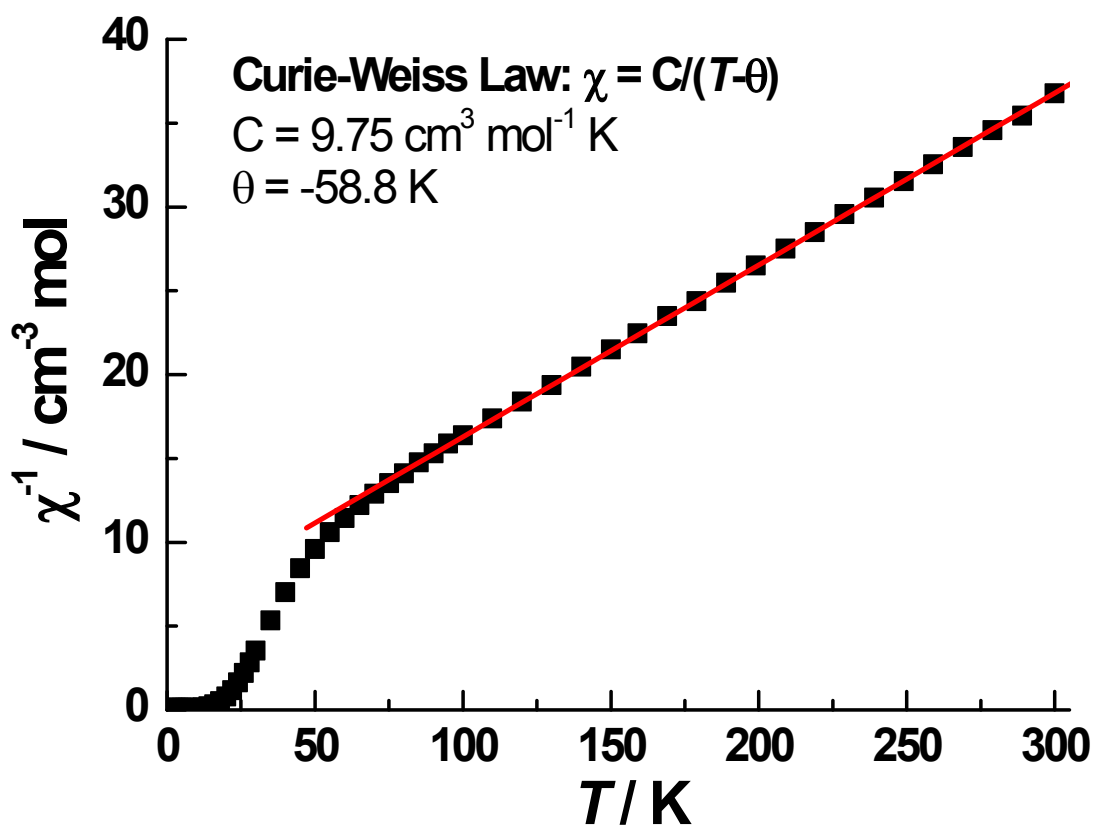

**Figure S5.** The temperature dependence of the inverse susceptibility for  $[\text{Co}_3(\text{H}_2\text{O})_2(\text{OH})_2(\text{C}_7\text{N}_5\text{H}_6)_4]$ . The red line through the data points is the fit to the Curie-Weiss law above 50 K.

**Table S1.** Sample and crystal data for  $[\text{Co}_3(\text{H}_2\text{O})_2(\text{OH})_2(\text{C}_7\text{N}_4\text{H}_8)_4]$ .

|                        |                                                                                      |                            |
|------------------------|--------------------------------------------------------------------------------------|----------------------------|
| Identification code    | $[\text{Co}_3(\text{H}_2\text{O})_2(\text{OH})_2(\text{C}_7\text{N}_4\text{H}_8)_4]$ |                            |
| Chemical formula       | $\text{C}_{28}\text{H}_{30}\text{Co}_3\text{N}_{20}\text{O}_4$                       |                            |
| Formula weight         | 887.51                                                                               |                            |
| Temperature            | 90(2) K                                                                              |                            |
| Wavelength             | 0.71073 Å                                                                            |                            |
| Crystal size           | 0.131 x 0.136 x 0.176 mm                                                             |                            |
| Crystal system         | Monoclinic                                                                           |                            |
| Space group            | P2(1)/n                                                                              |                            |
| Unit cell dimensions   | $a = 6.6673(5)$ Å                                                                    | $\alpha = 90^\circ$        |
|                        | $b = 21.2751(15)$ Å                                                                  | $\beta = 102.492(2)^\circ$ |
|                        | $c = 13.0771(9)$ Å                                                                   | $\gamma = 90^\circ$        |
| Volume                 | 1811.0(2) Å <sup>3</sup>                                                             |                            |
| Z                      | 2                                                                                    |                            |
| Density (calculated)   | 1.628 g/cm <sup>3</sup>                                                              |                            |
| Absorption coefficient | 1.424 mm <sup>-1</sup>                                                               |                            |
| F(000)                 | 902                                                                                  |                            |

**Table S2.** Data collection and structure refinement for [Co<sub>3</sub>(H<sub>2</sub>O)<sub>2</sub>(OH)<sub>2</sub>(C<sub>7</sub>N<sub>4</sub>H<sub>8</sub>)<sub>4</sub>].

|                                     |                                                                                                                       |
|-------------------------------------|-----------------------------------------------------------------------------------------------------------------------|
| Theta range for data collection     | 1.86 to 26.36°                                                                                                        |
| Index ranges                        | -8<=h<=6, -26<=k<=26, -16<=l<=16                                                                                      |
| Reflections collected               | 21478                                                                                                                 |
| Independent reflections             | 3708 [R(int) = 0.0225]                                                                                                |
| Coverage of independent reflections | 100.0%                                                                                                                |
| Absorption correction               | Multi-scan                                                                                                            |
| Max. and min. transmission          | 0.8350 and 0.7880                                                                                                     |
| Refinement method                   | Full-matrix least-squares on F <sup>2</sup>                                                                           |
| Refinement program                  | SHELXL-2013 (Sheldrick, 2013)                                                                                         |
| Function minimized                  | $\Sigma w(F_o^2 - F_c^2)^2$                                                                                           |
| Data / restraints / parameters      | 3708 / 7 / 271                                                                                                        |
| Goodness-of-fit on F <sup>2</sup>   | 1.061                                                                                                                 |
| $\Delta/\sigma_{\max}$              | 0.003                                                                                                                 |
| Final R indices                     | 3442 data; I>2 $\sigma$ (I)      R1 = 0.0232, wR2 = 0.0543<br>all data                      R1 = 0.0256, wR2 = 0.0552 |
| Weighting scheme                    | $w=1/[\sigma^2(F_o^2)+(0.0219P)^2+1.7561P]$<br>where $P=(F_o^2+2F_c^2)/3$                                             |
| Largest diff. peak and hole         | 0.626 and -0.262 eÅ <sup>-3</sup>                                                                                     |
| R.M.S. deviation from mean          | 0.057 eÅ <sup>-3</sup>                                                                                                |

**Table S3.** Atomic coordinates and equivalent isotropic atomic displacement parameters ( $\text{\AA}^2$ ) for  $[\text{Co}_3(\text{H}_2\text{O})_2(\text{OH})_2(\text{C}_7\text{N}_4\text{H}_8)_4]$ .

$U(\text{eq})$  is defined as one third of the trace of the orthogonalized  $U_{ij}$  tensor.

|     | <b>x/a</b>  | <b>y/b</b>  | <b>z/c</b>  | <b>U(eq)</b> |
|-----|-------------|-------------|-------------|--------------|
| Co1 | 0.5         | 0.5         | 0.0         | 0.00631(7)   |
| Co2 | 0.98249(3)  | 0.56695(2)  | 0.95344(2)  | 0.00686(6)   |
| O1  | 0.21342(16) | 0.51220(5)  | 0.05013(8)  | 0.0080(2)    |
| O2  | 0.76923(18) | 0.60969(6)  | 0.82694(9)  | 0.0137(2)    |
| N1  | 0.2364(3)   | 0.58064(8)  | 0.25847(12) | 0.0198(3)    |
| N2  | 0.0758(2)   | 0.56393(7)  | 0.73302(11) | 0.0165(3)    |
| N3  | 0.1414(2)   | 0.54858(7)  | 0.83340(11) | 0.0135(3)    |
| N4  | 0.4103(2)   | 0.54462(7)  | 0.76477(11) | 0.0164(3)    |
| N5  | 0.3453(2)   | 0.53847(7)  | 0.85363(11) | 0.0137(3)    |
| N6  | 0.8158(2)   | 0.60539(6)  | 0.06103(10) | 0.0101(3)    |
| N7  | 0.6325(2)   | 0.58591(6)  | 0.06858(10) | 0.0101(3)    |
| N8  | 0.8684(2)   | 0.65639(6)  | 0.12200(11) | 0.0120(3)    |
| N9  | 0.5602(2)   | 0.62281(7)  | 0.13546(11) | 0.0127(3)    |
| N10 | 0.6601(2)   | 0.84430(6)  | 0.48558(11) | 0.0106(3)    |
| C1  | 0.2396(3)   | 0.58029(9)  | 0.36583(14) | 0.0186(4)    |
| C2  | 0.0561(3)   | 0.58174(10) | 0.40109(14) | 0.0236(4)    |
| C3  | 0.4237(3)   | 0.57632(11) | 0.43946(15) | 0.0279(5)    |
| C4  | 0.0582(3)   | 0.57715(10) | 0.50691(15) | 0.0234(4)    |
| C5  | 0.4256(3)   | 0.57141(11) | 0.54540(15) | 0.0267(4)    |
| C6  | 0.2426(3)   | 0.57091(9)  | 0.58060(14) | 0.0184(4)    |
| C7  | 0.2437(3)   | 0.56099(8)  | 0.69131(13) | 0.0141(3)    |
| C8  | 0.7083(2)   | 0.66605(8)  | 0.16696(12) | 0.0113(3)    |
| C9  | 0.6961(3)   | 0.71522(8)  | 0.24459(13) | 0.0130(3)    |
| C10 | 0.8614(3)   | 0.75462(8)  | 0.28424(14) | 0.0152(3)    |
| C11 | 0.5176(3)   | 0.72077(8)  | 0.28335(14) | 0.0185(4)    |
| C12 | 0.8512(3)   | 0.79749(8)  | 0.36306(13) | 0.0148(3)    |
| C13 | 0.5069(3)   | 0.76306(8)  | 0.36243(14) | 0.0172(4)    |
| C14 | 0.6749(3)   | 0.80112(7)  | 0.40355(13) | 0.0114(3)    |



**Table S4.** Bond lengths (Å) for [Co<sub>3</sub>(H<sub>2</sub>O)<sub>2</sub>(OH)<sub>2</sub>(C<sub>7</sub>N<sub>4</sub>H<sub>8</sub>)<sub>4</sub>].

|          |            |          |            |
|----------|------------|----------|------------|
| Co1-N5   | 2.1315(14) | Co1-N5   | 2.1315(14) |
| Co1-N7   | 2.1407(14) | Co1-N7   | 2.1407(14) |
| Co1-O1   | 2.1655(11) | Co1-O1   | 2.1656(11) |
| Co2-N3   | 2.1116(14) | Co2-O1   | 2.1175(11) |
| Co2-O1   | 2.1252(11) | Co2-N6   | 2.1354(13) |
| Co2-O2   | 2.1372(12) | Co2-N10  | 2.2202(14) |
| O1-Co2   | 2.1253(11) | O1-H1    | 0.796(15)  |
| O2-H2A   | 0.820(16)  | O2-H2B   | 0.804(15)  |
| N1-C1    | 1.400(2)   | N1-H1A   | 0.909(16)  |
| N1-H1B   | 0.918(16)  | N2-N3    | 1.331(2)   |
| N2-C7    | 1.349(2)   | N3-N5    | 1.345(2)   |
| N4-N5    | 1.3316(19) | N4-C7    | 1.348(2)   |
| N6-N7    | 1.3142(19) | N6-N8    | 1.3473(19) |
| N7-N9    | 1.3400(19) | N7-Co1   | 2.1407(13) |
| N8-C8    | 1.341(2)   | N9-C8    | 1.347(2)   |
| N10-C14  | 1.432(2)   | N10-Co2  | 2.2202(14) |
| N10-H10A | 0.878(15)  | N10-H10B | 0.863(15)  |
| C1-C3    | 1.389(3)   | C1-C2    | 1.397(3)   |
| C2-C4    | 1.384(3)   | C2-H2    | 0.95       |
| C3-C5    | 1.387(3)   | C3-H3    | 0.95       |
| C4-C6    | 1.394(3)   | C4-H4    | 0.95       |
| C5-C6    | 1.394(3)   | C5-H5    | 0.95       |
| C6-C7    | 1.462(2)   | C8-C9    | 1.472(2)   |
| C9-C10   | 1.392(2)   | C9-C11   | 1.396(2)   |
| C10-C12  | 1.389(2)   | C10-H10  | 0.95       |
| C11-C13  | 1.384(2)   | C11-H11  | 0.95       |
| C12-C14  | 1.392(2)   | C12-H12  | 0.95       |
| C13-C14  | 1.392(2)   | C13-H13  | 0.95       |

**Table S5.** Bond angles (°) for [Co<sub>3</sub>(H<sub>2</sub>O)<sub>2</sub>(OH)<sub>2</sub>(C<sub>7</sub>N<sub>4</sub>H<sub>8</sub>)<sub>4</sub>].

|              |            |               |            |
|--------------|------------|---------------|------------|
| N5-Co1-N5    | 180.0      | N5-Co1-N7     | 97.13(5)   |
| N5-Co1-N7    | 82.88(5)   | N5-Co1-N7     | 82.87(5)   |
| N5-Co1-N7    | 97.12(5)   | N7-Co1-N7     | 180.00(4)  |
| N5-Co1-O1    | 86.48(5)   | N5-Co1-O1     | 93.52(5)   |
| N7-Co1-O1    | 94.71(5)   | N7-Co1-O1     | 85.29(5)   |
| N5-Co1-O1    | 93.52(5)   | N5-Co1-O1     | 86.48(5)   |
| N7-Co1-O1    | 85.29(5)   | N7-Co1-O1     | 94.71(5)   |
| O1-Co1-O1    | 180.0      | N3-Co2-O1     | 85.71(5)   |
| N3-Co2-O1    | 104.00(5)  | O1-Co2-O1     | 86.64(4)   |
| N3-Co2-N6    | 167.69(5)  | O1-Co2-N6     | 103.42(5)  |
| O1-Co2-N6    | 85.00(5)   | N3-Co2-O2     | 81.96(5)   |
| O1-Co2-O2    | 166.48(5)  | O1-Co2-O2     | 90.99(5)   |
| N6-Co2-O2    | 89.60(5)   | N3-Co2-N10    | 88.01(5)   |
| O1-Co2-N10   | 93.76(5)   | O1-Co2-N10    | 167.98(5)  |
| N6-Co2-N10   | 83.21(5)   | O2-Co2-N10    | 91.32(5)   |
| Co2-O1-Co2   | 93.36(4)   | Co2-O1-Co1    | 117.41(5)  |
| Co2-O1-Co1   | 118.47(5)  | Co2-O1-H1     | 109.9(14)  |
| Co2-O1-H1    | 105.6(14)  | Co1-O1-H1     | 110.5(14)  |
| Co2-O2-H2A   | 111.8(15)  | Co2-O2-H2B    | 102.3(15)  |
| H2A-O2-H2B   | 103.(2)    | C1-N1-H1A     | 113.5(14)  |
| C1-N1-H1B    | 115.1(14)  | H1A-N1-H1B    | 114.6(19)  |
| N3-N2-C7     | 105.24(14) | N2-N3-N5      | 109.62(13) |
| N2-N3-Co2    | 125.23(11) | N5-N3-Co2     | 122.12(10) |
| N5-N4-C7     | 105.88(14) | N4-N5-N3      | 108.58(13) |
| N4-N5-Co1    | 129.48(11) | N3-N5-Co1     | 120.67(10) |
| N7-N6-N8     | 109.69(12) | N7-N6-Co2     | 123.62(10) |
| N8-N6-Co2    | 126.33(10) | N6-N7-N9      | 109.61(12) |
| N6-N7-Co1    | 122.96(10) | N9-N7-Co1     | 126.84(10) |
| C8-N8-N6     | 104.64(13) | N7-N9-C8      | 104.87(13) |
| C14-N10-Co2  | 121.61(10) | C14-N10-H10A  | 109.4(13)  |
| Co2-N10-H10A | 107.8(13)  | C14-N10-H10B  | 108.8(13)  |
| Co2-N10-H10B | 101.0(13)  | H10A-N10-H10B | 107.3(18)  |
| C3-C1-C2     | 118.55(17) | C3-C1-N1      | 120.97(17) |
| C2-C1-N1     | 120.45(17) | C4-C2-C1      | 120.53(17) |
| C4-C2-H2     | 119.7      | C1-C2-H2      | 119.7      |
| C5-C3-C1     | 120.84(18) | C5-C3-H3      | 119.6      |
| C1-C3-H3     | 119.6      | C2-C4-C6      | 120.95(17) |
| C2-C4-H4     | 119.5      | C6-C4-H4      | 119.5      |
| C3-C5-C6     | 120.73(18) | C3-C5-H5      | 119.6      |
| C6-C5-H5     | 119.6      | C5-C6-C4      | 118.33(17) |

|             |            |             |            |
|-------------|------------|-------------|------------|
| C5-C6-C7    | 120.73(16) | C4-C6-C7    | 120.87(16) |
| N4-C7-N2    | 110.62(15) | N4-C7-C6    | 124.75(15) |
| N2-C7-C6    | 124.56(15) | N8-C8-N9    | 111.18(14) |
| N8-C8-C9    | 125.39(15) | N9-C8-C9    | 123.37(15) |
| C10-C9-C11  | 118.83(15) | C10-C9-C8   | 121.82(15) |
| C11-C9-C8   | 119.29(15) | C12-C10-C9  | 120.67(15) |
| C12-C10-H10 | 119.7      | C9-C10-H10  | 119.7      |
| C13-C11-C9  | 120.79(16) | C13-C11-H11 | 119.6      |
| C9-C11-H11  | 119.6      | C10-C12-C14 | 119.96(16) |
| C10-C12-H12 | 120.0      | C14-C12-H12 | 120.0      |
| C11-C13-C14 | 119.97(16) | C11-C13-H13 | 120.0      |
| C14-C13-H13 | 120.0      | C12-C14-C13 | 119.72(15) |
| C12-C14-N10 | 121.41(15) | C13-C14-N10 | 118.86(15) |

**Table S6.** Torsion angles (°) for [Co<sub>3</sub>(H<sub>2</sub>O)<sub>2</sub>(OH)<sub>2</sub>(C<sub>7</sub>N<sub>4</sub>H<sub>8</sub>)<sub>4</sub>].

|                 |             |                 |             |
|-----------------|-------------|-----------------|-------------|
| C7-N2-N3-N5     | 1.93(18)    | C7-N2-N3-Co2    | 162.45(12)  |
| C7-N4-N5-N3     | 2.31(18)    | C7-N4-N5-Co1    | 169.25(12)  |
| N2-N3-N5-N4     | -2.72(18)   | Co2-N3-N5-N4    | -163.95(11) |
| N2-N3-N5-Co1    | -171.02(11) | Co2-N3-N5-Co1   | 27.75(17)   |
| N8-N6-N7-N9     | -0.79(17)   | Co2-N6-N7-N9    | -174.18(10) |
| N8-N6-N7-Co1    | -172.53(10) | Co2-N6-N7-Co1   | 14.08(17)   |
| N7-N6-N8-C8     | 0.51(17)    | Co2-N6-N8-C8    | 173.68(11)  |
| N6-N7-N9-C8     | 0.71(17)    | Co1-N7-N9-C8    | 172.05(11)  |
| C3-C1-C2-C4     | -2.2(3)     | N1-C1-C2-C4     | 175.65(19)  |
| C2-C1-C3-C5     | 2.5(3)      | N1-C1-C3-C5     | -175.3(2)   |
| C1-C2-C4-C6     | -0.1(3)     | C1-C3-C5-C6     | -0.6(3)     |
| C3-C5-C6-C4     | -1.7(3)     | C3-C5-C6-C7     | 175.4(2)    |
| C2-C4-C6-C5     | 2.0(3)      | C2-C4-C6-C7     | -175.02(18) |
| N5-N4-C7-N2     | -1.13(19)   | N5-N4-C7-C6     | -178.09(16) |
| N3-N2-C7-N4     | -0.49(19)   | N3-N2-C7-C6     | 176.48(16)  |
| C5-C6-C7-N4     | -8.0(3)     | C4-C6-C7-N4     | 168.92(18)  |
| C5-C6-C7-N2     | 175.41(18)  | C4-C6-C7-N2     | -7.6(3)     |
| N6-N8-C8-N9     | -0.06(18)   | N6-N8-C8-C9     | 177.22(15)  |
| N7-N9-C8-N8     | -0.39(18)   | N7-N9-C8-C9     | -177.74(15) |
| N8-C8-C9-C10    | -4.4(3)     | N9-C8-C9-C10    | 172.54(16)  |
| N8-C8-C9-C11    | 178.62(17)  | N9-C8-C9-C11    | -4.4(3)     |
| C11-C9-C10-C12  | 1.8(3)      | C8-C9-C10-C12   | -175.19(16) |
| C10-C9-C11-C13  | -2.3(3)     | C8-C9-C11-C13   | 174.79(16)  |
| C9-C10-C12-C14  | 0.3(3)      | C9-C11-C13-C14  | 0.6(3)      |
| C10-C12-C14-C13 | -2.0(3)     | C10-C12-C14-N10 | 179.32(15)  |
| C11-C13-C14-C12 | 1.6(3)      | C11-C13-C14-N10 | -179.75(16) |
| Co2-N10-C14-C12 | 102.87(16)  | Co2-N10-C14-C13 | -75.80(18)  |

**Table S7.** Anisotropic atomic displacement parameters ( $\text{\AA}^2$ ) for  $[\text{Co}_3(\text{H}_2\text{O})_2(\text{OH})_2(\text{C}_7\text{N}_4\text{H}_8)_4]$ .

The anisotropic atomic displacement factor exponent takes the form:  $-2\pi^2[ h^2 a^{*2} U_{11} + \dots + 2 h k a^* b^* U_{12} ]$

|     | $U_{11}$    | $U_{22}$    | $U_{33}$    | $U_{23}$     | $U_{13}$    | $U_{12}$     |
|-----|-------------|-------------|-------------|--------------|-------------|--------------|
| Co1 | 0.00606(14) | 0.00684(14) | 0.00617(14) | -0.00008(11) | 0.00161(10) | -0.00001(11) |
| Co2 | 0.00666(11) | 0.00709(11) | 0.00726(11) | 0.00078(8)   | 0.00244(8)  | 0.00024(8)   |
| O1  | 0.0087(5)   | 0.0095(5)   | 0.0060(5)   | -0.0011(4)   | 0.0025(4)   | -0.0001(4)   |
| O2  | 0.0101(6)   | 0.0172(6)   | 0.0136(6)   | 0.0031(5)    | 0.0023(5)   | -0.0002(5)   |
| N1  | 0.0187(8)   | 0.0269(9)   | 0.0140(7)   | 0.0004(6)    | 0.0043(6)   | 0.0002(7)    |
| N2  | 0.0168(7)   | 0.0216(8)   | 0.0114(7)   | 0.0015(6)    | 0.0037(6)   | 0.0005(6)    |
| N3  | 0.0160(7)   | 0.0152(7)   | 0.0106(6)   | 0.0031(5)    | 0.0060(5)   | 0.0051(6)    |
| N4  | 0.0163(7)   | 0.0204(8)   | 0.0132(7)   | 0.0011(6)    | 0.0050(6)   | -0.0002(6)   |
| N5  | 0.0198(7)   | 0.0134(7)   | 0.0093(6)   | 0.0007(5)    | 0.0061(6)   | 0.0039(6)    |
| N6  | 0.0102(6)   | 0.0091(6)   | 0.0117(6)   | -0.0023(5)   | 0.0042(5)   | -0.0019(5)   |
| N7  | 0.0100(6)   | 0.0102(6)   | 0.0105(6)   | -0.0018(5)   | 0.0034(5)   | 0.0003(5)    |
| N8  | 0.0135(7)   | 0.0100(6)   | 0.0135(7)   | -0.0040(5)   | 0.0049(5)   | -0.0015(5)   |
| N9  | 0.0124(7)   | 0.0136(7)   | 0.0132(7)   | -0.0048(5)   | 0.0049(5)   | 0.0000(5)    |
| N10 | 0.0106(7)   | 0.0105(7)   | 0.0113(7)   | -0.0024(5)   | 0.0037(5)   | 0.0005(5)    |
| C1  | 0.0208(9)   | 0.0205(9)   | 0.0151(8)   | 0.0002(7)    | 0.0052(7)   | -0.0002(7)   |
| C2  | 0.0171(9)   | 0.0364(11)  | 0.0157(9)   | 0.0033(8)    | 0.0004(7)   | 0.0021(8)    |
| C3  | 0.0177(9)   | 0.0488(13)  | 0.0188(9)   | 0.0026(9)    | 0.0074(8)   | -0.0016(9)   |
| C4  | 0.0168(9)   | 0.0373(11)  | 0.0177(9)   | 0.0027(8)    | 0.0071(7)   | 0.0028(8)    |
| C5  | 0.0161(9)   | 0.0473(13)  | 0.0160(9)   | 0.0017(8)    | 0.0020(7)   | -0.0006(9)   |
| C6  | 0.0195(9)   | 0.0227(9)   | 0.0132(8)   | 0.0006(7)    | 0.0042(7)   | 0.0003(7)    |
| C7  | 0.0126(8)   | 0.0169(8)   | 0.0126(8)   | -0.0009(6)   | 0.0025(6)   | -0.0006(6)   |
| C8  | 0.0108(7)   | 0.0106(8)   | 0.0125(8)   | -0.0018(6)   | 0.0022(6)   | 0.0009(6)    |
| C9  | 0.0133(8)   | 0.0108(8)   | 0.0152(8)   | -0.0038(6)   | 0.0038(6)   | 0.0011(6)    |
| C10 | 0.0129(8)   | 0.0162(8)   | 0.0192(8)   | -0.0044(7)   | 0.0091(7)   | -0.0011(7)   |
| C11 | 0.0117(8)   | 0.0180(9)   | 0.0263(10)  | -0.0108(7)   | 0.0056(7)   | -0.0046(7)   |
| C12 | 0.0133(8)   | 0.0126(8)   | 0.0188(8)   | -0.0051(7)   | 0.0043(7)   | -0.0037(6)   |
| C13 | 0.0132(8)   | 0.0171(9)   | 0.0235(9)   | -0.0076(7)   | 0.0089(7)   | -0.0013(7)   |
| C14 | 0.0140(8)   | 0.0080(7)   | 0.0125(8)   | -0.0012(6)   | 0.0034(6)   | 0.0021(6)    |

**Table S8.** Hydrogen atomic coordinates and isotropic atomic displacement parameters ( $\text{\AA}^2$ ) for  $[\text{Co}_3(\text{H}_2\text{O})_2(\text{OH})_2(\text{C}_7\text{N}_4\text{H}_8)_4]$ .

|      | <b>x/a</b> | <b>y/b</b> | <b>z/c</b> | <b>U(eq)</b> |
|------|------------|------------|------------|--------------|
| H1   | 1.234(3)   | 0.5249(9)  | 1.1087(12) | 0.01         |
| H2A  | 0.666(3)   | 0.5882(9)  | 0.8080(16) | 0.016        |
| H2B  | 0.827(3)   | 0.6065(10) | 0.7793(14) | 0.016        |
| H1A  | 1.127(3)   | 0.6013(10) | 0.2196(16) | 0.024        |
| H1B  | 1.360(3)   | 0.5897(10) | 0.2415(16) | 0.024        |
| H10A | 0.784(2)   | 0.8538(9)  | 1.5208(14) | 0.013        |
| H10B | 0.597(3)   | 0.8261(9)  | 1.5286(14) | 0.013        |
| H2   | 0.9290     | 0.5859     | 0.3520     | 0.028        |
| H3   | 1.5499     | 0.5770     | 0.4169     | 0.033        |
| H4   | 0.9323     | 0.5783     | 0.5297     | 0.028        |
| H5   | 1.5530     | 0.5683     | 0.5945     | 0.032        |
| H10  | 0.9823     | 0.7521     | 1.2571     | 0.018        |
| H11  | 0.4020     | 0.6952     | 1.2551     | 0.022        |
| H12  | 0.9646     | 0.8243     | 1.3893     | 0.018        |
| H13  | 0.3850     | 0.7661     | 1.3886     | 0.021        |

**Table S9.** Hydrogen bond distances ( $\text{\AA}$ ) and angles ( $^\circ$ ) for  $[\text{Co}_3(\text{H}_2\text{O})_2(\text{OH})_2(\text{C}_7\text{N}_4\text{H}_8)_4]$ .

|             | <b>Donor-H</b> | <b>Acceptor-H</b> | <b>Donor-Acceptor</b> | <b>Angle</b> |
|-------------|----------------|-------------------|-----------------------|--------------|
| O1-H1...N1  | 0.796(15)      | 2.286(15)         | 3.0636(19)            | 165.6        |
| O2-H2B...N2 | 0.804(15)      | 2.090(18)         | 2.7784(19)            | 144.0        |
| O2-H2A...N4 | 0.820(16)      | 1.914(16)         | 2.7317(19)            | 175.0        |
